# Supplementary material
Source: publisher site journal article supplement (https://static.cambridge.org/content/id/urn:cambridge.org:id:article:S0003055420000234/resource/name/S0003055420000234supp001.pdf)
Supplement: Supplementary file 1 [file S0003055420000234supp001.pdf]

The Rise and Fall of Social Democracy, 1918-2017.  
ONLINE APPENDIX

April 3, 2020

# 1 Appendix 1: Description of the Variables

**Centre Right economic left-right position:** Economic left-right location of the main centre right competitor party in the year of the election, as measured by party manifesto coding. Source: Comparative Manifestos Project data, release 2016b (<https://manifestoproject.wzb.eu>).

**Centre Right left-right position:** Left-right location of the main centre right competitor party in the year of the election, as measured by party manifesto coding. Source: Comparative Manifestos Project data, release 2016b.

**Centre Right social liberal-authority position:** Social left-right location of the main centre right competitor party in the year of the election, as measured by party manifesto coding. Source: Comparative Manifestos Project data, release 2016b.

**Centre Right vote share:** Vote share of the centre right (conservative and Christian democratic) party/parties (percent) in the election. Source: Nohlen and Stoever (2010), plus national election commissions. We allocated parties to party families via their European and international party memberships and existing categorizations, in particular Von Beyme (1985), Jacobs (1989), and Hix and Lord (1997).

**District magnitude (log):** Natural log of the electoral system median district magnitude in the year of the election. Source: Boix (1999), Carey and Hix (2011), the Constituency-Level Election Archive (CLEA) (<http://www.electiondataarchive.org>), and estimated from the size of the legislature.

**Employment in agriculture (percent):** Employment in agriculture (as a percent of total employment) in the year of the election. Source: World Bank Development Indicator, SL.AGR.EMPL.ZS  
(<http://data.worldbank.org/data-catalog/world-development-indicators>).

**Employment in industry (percent):** Employment in industry (as a percent of total employment) in the year of the election. Source: World Bank Development Indicator, SL.IND.EMPL.ZS.

**EU member:** Country is a member of the ECSC, EEC, or EU in the year of the election. Source: European Union ([https://europa.eu/european-union/about-eu/history\\_en](https://europa.eu/european-union/about-eu/history_en)).

**Eurozone member:** Country is a member of the Eurozone in the EU in the year of the election. Source: European Union  
([https://europa.eu/european-union/about-eu/history\\_en](https://europa.eu/european-union/about-eu/history_en)).

**GDP growth:** Annual Gross Domestic Product (GDP) in the year of the election. Source: Maddison Project data  
(<http://www.ggd.net/maddison/maddison-project/home.htm>). Corrected to remove extreme outliers (less than -25 or greater than 25). Missing data entered from closest source, such as Penn World Tables (<http://cid.econ.ucdavis.edu/pwt.html>) or World Bank Development Indicator, or closest year in Maddison Project data.

**GDP per capita (log):** Natural log of GDP per capita in the year of the election. Source: Maddison Project Data (1990 Int. GK dollars). Missing data entered from closest source, such as Penn World Tables, or World Bank Development Indicator, or closest year

in Maddison Project data.

**Globalization index:** KOG Globalization index (<https://www.kof.ethz.ch/en/forecasts-and-indicators/indicators/kof-globalisation-index.html>). Source: Gygli et al. (2019).

**Higher education:** Gross enrollment ratio, tertiary, both sexes (percent) in the year of the election. Source: World Bank Development indicator, SE.TER.ENRR.

**Inflation:** Consumer price inflation (annual percent) in the year of the election. Source: World Bank Development Indicator, FP.CPI.TOTL.ZG.

**Life expectancy:** Life expectancy at birth, total (years) in the year of election. Source: World Bank Development indicator, SP.DYN.LE00.IN.

**Manufacturing index:** Index of manufacturing production (1953=100), which measures the volume of trade in manufactured goods in a country relative to 1953. Source: UN International Trade Statistics, 1900-1960.

**Population:** Natural log of total population in the year of the election. Source: World Bank Development indicator, SP.POP.TOTL.

**Population aged 0 to 14:** Population aged 0 to 14 (percent of the total) in the year of the election. Source: World Bank Development indicator, SP.POP.0014.TO.ZS.

**Population aged 65 and over:** Population aged 65 and older (percent of the total) in

the year of the election. Source: World Bank Development indicator, SP.POP.65UP.TO.ZS.

**Population growth:** Population growth (annual percent change) in the year of the election. Source: World Bank Development indicator, SP.POP.GROW.

**Post-tax inequality (GINI):** Post-tax and spending income inequality in the year of the election, as measured by GINI coefficient. Source: Standardized World Income Inequality Database, version 5.1 (<http://fsolt.org/swiid>).

**Public spending (percent of GDP):** Government expenditure in the year of the election (as a percent of GDP). Source: combined from general government final consumption expenditure in the year of the election (as a percent of GDP) from the World Bank Development Indicator (GC.XPN.TOTL.GD.ZS) and government expenditure in the year of the election (as a percent of GDP) from Our World in Data (<https://ourworldindata.org/public-spending>).

**SD economic left-right position:** Economic left-right location of social democratic party in an election, as measured by party manifesto coding. Source: Comparative Manifestos Project data, release 2016b.

**SD party in gov't (coalition-junior):** coded 1 if (at the time of the election) the social democratic party is in a coalition government, but does not hold the Prime Minister position. Source: Nohlen and Stoeber (2010), plus other available sources.

**SD party in gov't (coalition-PM):** coded 1 if (at the time of the election) the social democratic party is in a coalition government, and also holds the Prime Minister position.

Source:Nohlen and Stoever (2010), plus other available sources.

**SD party in gov't (single-party):** coded 1 if (at the time of the election) the social democratic party is in government, and is the only party in the government. Source:Nohlen and Stoever (2010), plus other available sources.

**SD social liberal-authority position:** Social left-right location of the social democratic party in an election, as measured by party manifesto coding. Source: Comparative Manifestos Project data, release 2016b.

**(Semi) Presidential system:** Presidential, semi-presidential, or power-sharing regime in the year of the election. Source: Robert Elgie ([http://www.semi\(Semi\)Presidentialism.com/?p=1053](http://www.semi(Semi)Presidentialism.com/?p=1053)).

**Share of industry in GDP:** Share of the industrial sector in gross domestic product, measured in constant 2011 international-dollars. Source: Timmer et al. (2015).

**Social Democrat left-right position:** Left-right location of the social democratic party in an election, as measured by party manifesto coding. Source: Comparative Manifestos Project data, release 2016b.

**Social Democratic party electorate share:** Share of total electorate (percent) won by the social democratic party in the election. Source: Nohlen and Stoever (2010), plus national election commissions.

**Social Democratic party vote share:** Share of votes (percent) won by the social

democratic party in the election. Source:Nohlen and Stoever (2010), plus national election commissions.

**Total left vote share:** Vote share of the social democrats and the radical/ other left party/parties (percent) in the election. Source: Nohlen and Stoever (2010), plus national election commissions.

**Turnout: Turnout (percent) in the election.** Source: Nohlen and Stoever (2010), plus national election commissions.

**Unemployment:** Unemployment in the year of the election, as a percent of the total labour force (modelled International Labor Organization (ILO) estimate. Source: World Bank Development Indicator, SL.UEM.TOTL.ZS.

**Union density:** Trade union density (measured as the percent of total wage earners who are trade union members) in the year of the election. Source: ICTWSS: Database on Institutional Characteristics of Trade Unions, Wage Setting, State Intervention and Social Pacts in 51 countries between 1960 and 2014 (<http://www.uva-aias.net/en/ictwss>).

**Urban population:** Urban population (as a percent of total population) in the year of the election. Source: World Bank Development indicator, SP.URB.TOTL.IN.ZS.

**Women in work:** Labour force participation rate, female (as a percent of the female population aged 15 or older), national estimate. Source: World Bank Development indicator, SL.TLF.CACT.FE.NE.ZS.

**Years of democracy:** Number of years of continuous democracy in the year of the election ( $\text{POLITY} \geq 7$ ), counted from year of first election, and then starting again at 1 following a period of a non-democracy. Source: Polity IV project (<http://www.systemicpeace.org/polityproject.html>).

**Youth unemployment:** Youth unemployment in the year of the election, as a percent of the labour force aged 15 to 24 (modelled ILO estimate). Source: World Bank Development Indicator, SL.UEM.1524.ZS.



## 2 Appendix 2: Supplementary Figures and Tables

Figure A1: Vote shares of social democratic parties in Western Europe

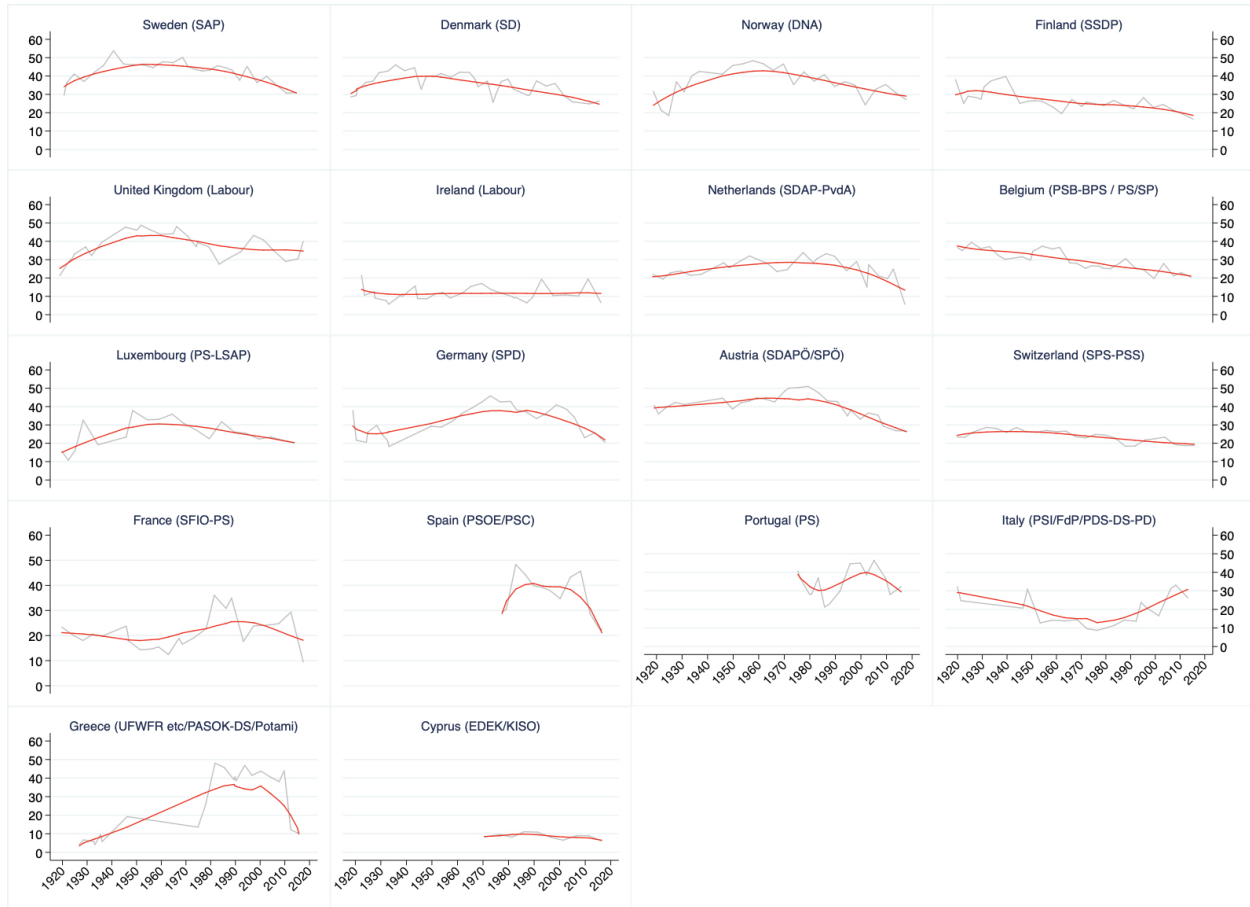

Note: The lines are estimated by locally weighted scatterplot smoothing.

Figure A2: Vote shares of social democratic parties in Eastern Europe

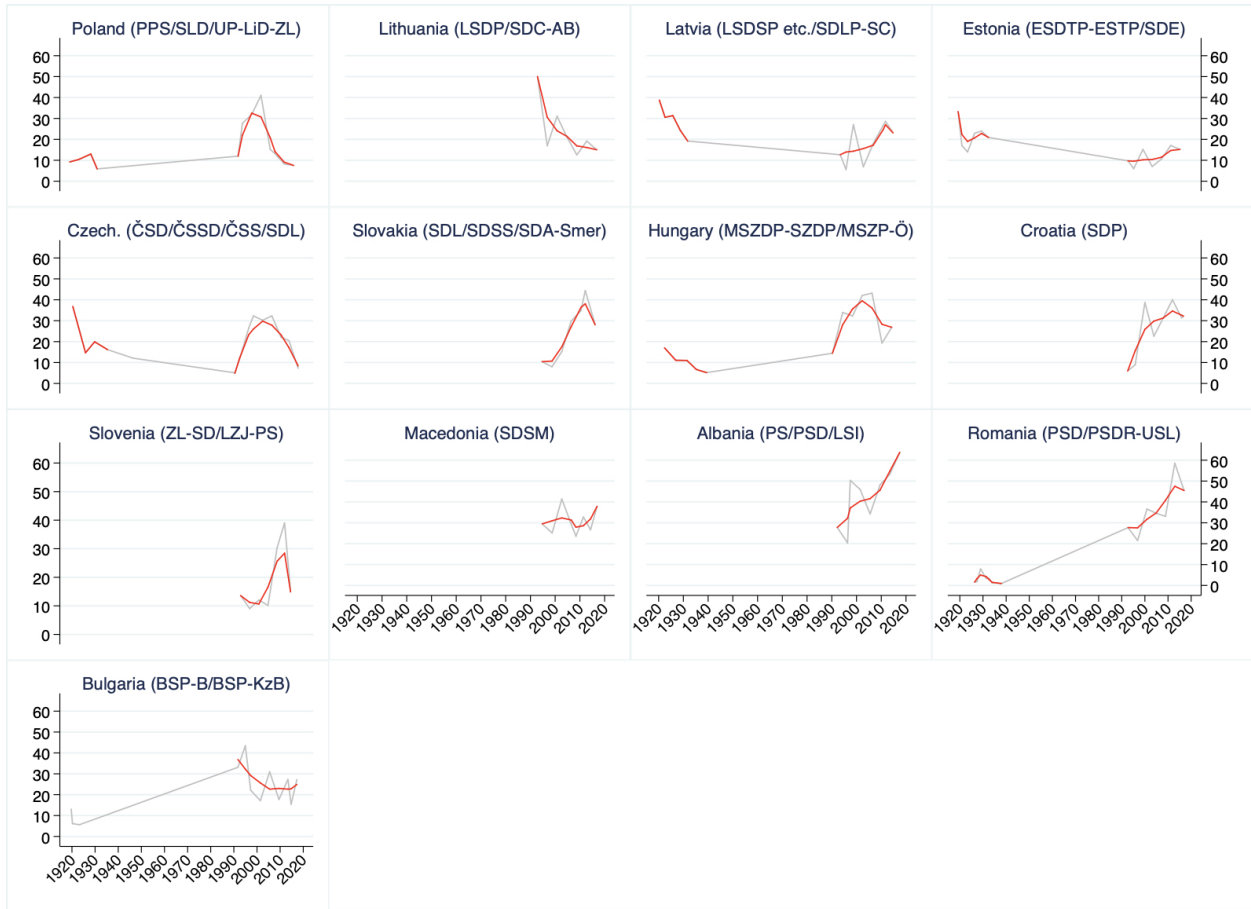

Note: The lines are estimated by locally weighted scatterplot smoothing.

Figure A3: Vote shares of social democratic parties in 4 regions

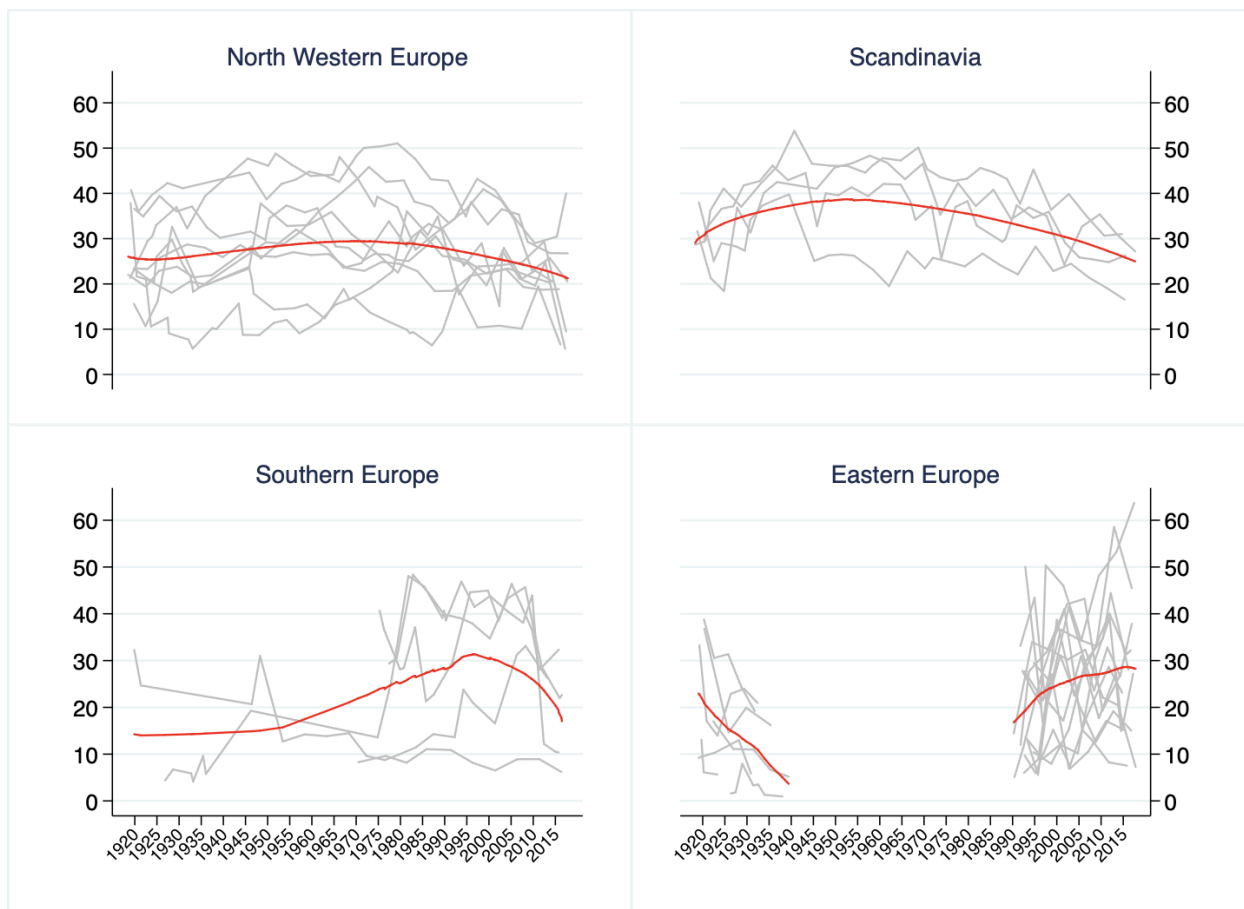

Note: The lines are estimated by locally weighted scatterplot smoothing. North Western Europe: Austria, Belgium, France, Germany, Ireland, Luxembourg, Netherlands, Switzerland, United Kingdom. Scandinavia: Denmark, Finland, Norway, Sweden. Southern Europe: Cyprus, Greece, Italy, Portugal, Spain. Eastern Europe: Albania, Bulgaria, Croatia, Czechoslovakia/Czech Republic, Estonia, Hungary, Latvia, Lithuania, Macedonia, Poland, Romania, Slovakia, Slovenia.

Table A2: Cases of social democratic parties

| Country                       | Abbr         | Name                                                                                                   | English name                                                                                                                                        | Years                |
|-------------------------------|--------------|--------------------------------------------------------------------------------------------------------|-----------------------------------------------------------------------------------------------------------------------------------------------------|----------------------|
| Albania                       | PS           | Partia Socialiste e Shqipërisë                                                                         | Socialist Party of Albania                                                                                                                          | 1992-2017            |
| Albania                       | PSD          | Partia Socialdemokrate e Shqipërisë                                                                    | Social Democratic Party of Albania                                                                                                                  | 1992-2017            |
| Albania                       | LSI          | Lëvizja Socialiste për Integrim                                                                        | Socialist Movement for Integration                                                                                                                  | 2004-2017            |
| Austria                       | SDAPÖ        | Sozialdemokratische Arbeiterpartei Österreichs                                                         | Social Democratic Workers' Party of Austria                                                                                                         | 1918-1945            |
| Austria                       | SPÖ          | Sozialistische/Sozialdemokratische Partei Österreichs                                                  | Socialist/Social Democratic Party of Austria                                                                                                        | 1945-1945            |
| Belgium                       | BWP/POB      | Parti Ouvrier Belge/Belgische Werkliedenpartij                                                         | Belgian Labour Party                                                                                                                                | 1918-1945            |
| Belgium                       | PSB/BSP      | Parti socialiste Belge/Belgische Socialistische Partij                                                 | Belgian Socialist Party                                                                                                                             | 1945-1978            |
| Belgium                       | PS           | Parti socialiste                                                                                       | Socialist Party (Wallonia)                                                                                                                          | 1978-2017            |
| Belgium                       | SP / SPa     | Sozialistische Partij / Socialistische Partij Anders                                                   | Socialist Party / Socialist Party Differently (Flanders)                                                                                            | 1978-2017            |
| Bulgaria                      | BSP-B        | Balgarska rabotnicheska sotsialdemokraticheska partia (shiroki sotsialist)                             | Bulgarian Social Democratic Workers Party (Broad Socialists)                                                                                        | 1919-1923            |
| Bulgaria                      | BSP / KzB    | Balgarska sotsialisticheska partiya / Koalitsiya za Bulgaria                                           | Bulgarian Socialist Party / Coalition for Bulgaria                                                                                                  | 1991-2017            |
| Croatia                       | SDP          | Socijaldemokratska partija Hrvatske                                                                    | Social Democratic Party of Croatia                                                                                                                  | 1992-2017            |
| Cyprus                        | EDEK / KISOS | Kinima Sosialdimokraton Eniaia Dimokratiki Enosi Kentrou / Kinima Sosialdimokraton                     | Movement of Social Democrats / Social Democrats Movement                                                                                            | 1960-2017            |
| Czechoslovakia/Czech Republic | ČSDSD / ČSD  | Československá sociálně-demokratická dělnická / Československá sociální demokracie                     | Czechoslovak Social Democratic Workers Party / Czechoslovak Social Democracy / Czechoslovak Social Democratic Party / Czech Social Democratic Party | 1920-1946            |
| Czechoslovakia/Czech Republic | SDSDAP       | Deutsche sozialdemokratische Arbeiterpartei in der Tschechoslowakischen Republik                       | German Social Democratic Workers' Party in the Czechoslovak Republic                                                                                | 1920-1938            |
| Czechoslovakia/Czech Republic | SD / ČSSD    | Sociální demokracie / Československá strana sociálně demokratická / Česká strana sociálně demokratická | Social Democracy / Czechoslovak Social Democratic Party / Czech Social Democratic Party                                                             | 1990-2017            |
| Czechoslovakia/Czech Republic | ČSS          | Československá strana socialistická                                                                    | Czechoslovak Socialist Party                                                                                                                        | 1990-1991            |
| Czechoslovakia/Czech Republic | SDL          | Strana demokratickej ľavice                                                                            | Party of the Democratic Left                                                                                                                        | 1992-1995            |
| Denmark                       | SD           | Socialdemokratiet                                                                                      | Social Democrats                                                                                                                                    | 1918-2017            |
| Estonia                       | ESDTP / ESTP | Eesti Sotsiaaldemokraatiline Tööliste Partei / Eesti Sotsialistlik Tööliste Partei                     | Estonian Social Democratic Workers' Party / Estonian Socialist Workers' Party                                                                       | 1918-1933            |
| Estonia                       | SDE          | Sotsiaaldemokraatlik Erakond                                                                           | Social Democratic Party                                                                                                                             | 1992-2017            |
| Finland                       | SSDP         | Suomen Sosialidemokraattinen Puolue                                                                    | Social Democratic Party of Finland                                                                                                                  | 1918-2017            |
| France                        | SFIO         | Section Française de l'Internationale Ouvrière                                                         | French Section of the Socialist International                                                                                                       | 1918-1965            |
| France                        | FGDS         | Fédération de la gauche démocrate et socialiste                                                        | Federation of the Democratic and Socialist Left                                                                                                     | 1965-1969            |
| France                        | PS           | Parti socialiste                                                                                       | Socialist Party                                                                                                                                     | 1969-2017            |
| Germany                       | SPD          | Sozialdemokratische Partei Deutschlands                                                                | Social Democratic Party of Germany                                                                                                                  | 1918-2017            |
| Greece                        | UFWFR        | United Front of Workers, Farmers and Refugees                                                          | United Front of Workers, Farmers and Refugees                                                                                                       | 1926-1927            |
| Greece                        | ALP          | Agricultural and Labour Party                                                                          | Agricultural and Labour Party                                                                                                                       | 1928-1934            |
| Greece                        | APF          | All People Front                                                                                       | All People Front                                                                                                                                    | 1935-1945            |
| Greece                        | NPU          | National Political Union                                                                               | National Political Union                                                                                                                            | 1946-1948            |
| Greece                        | PASOK / DS   | Panellinio Sosisialistiko Kinima Ellados / Dimokratiki Symparataxi                                     | Pan-Hellenic Socialist Movement / Democratic Alignment                                                                                              | 1974-2017            |
| Greece                        | Potami       | To Potami                                                                                              | The River                                                                                                                                           | 2015-2017            |
| Hungary                       | MSZDP / SZDP | Magyarországi Szociáldemokrata Párt / Szociáldemokrata Párt                                            | Hungarian Social Democratic Party / Social Democratic Party                                                                                         | 1920-1994            |
| Hungary                       | MSZP         | Magyar Szocialista Párt                                                                                | Hungarian Socialist Party                                                                                                                           | 1989-2013            |
| Hungary                       | Ö            | Összefogás                                                                                             | Unity                                                                                                                                               | 2014-2017            |
| Ireland                       | Lab          | Labour Party                                                                                           | Labour Party                                                                                                                                        | 1918-2017            |
| Italy                         | PSI          | Partito Socialista Italiano / Partito Socialista Unificato (1968)                                      | Italian Socialist Party / Unified Socialist Party                                                                                                   | 1918-1947, 1953-1966 |
| Italy                         | FdP          | Fronte del Popolo (PCI+PSI)                                                                            | People's Front                                                                                                                                      | 1948-1952            |
| Italy                         | PCI/PDS/DS   | Partito Democratico della Sinistra / Democristici di Sinistra                                          | Democratic Party of the Left / Democrats of the Left                                                                                                | 1967-2005            |
| Italy                         | Ulivo / PD   | L'Ulivo / Partito Democratico                                                                          | The Olive Tree / Democratic Party                                                                                                                   | 2006-2017            |
| Latvia                        | LSDSP        | Latvijas Sociāldemokrātiskā Strādnieku Partija                                                         | Latvian Social Democratic Workers' Party                                                                                                            | 1920-2017            |
| Latvia                        | SLAT / TSP   | Saskaņa Latvīji - Atdzimšana Tautsaimniecībai / Tautas Saskaņas partija                                | Harmony for Latvia / National Harmony Party (of Russian minority)                                                                                   | 1990-1994            |
| Latvia                        | SDS / SDP    | Sociāldemokrātu savienība / Sociāldemokrātiskā partija                                                 | Social Democratic Union / Social Democratic Party                                                                                                   | 2002-2005            |
| Latvia                        | SDLP         | Sociāldemokrātiskā Labklājības partija                                                                 | Social Democratic Welfare Party                                                                                                                     | 2002-2005            |
| Latvia                        | SC / SDPS    | Saskaņas Centrs / Sociāldemokrātiskā Partija "Saskaņa"                                                 | Harmony Centre / Social Democratic Party "Harmony"                                                                                                  | 2006-2017            |
| Lithuania                     | LSDP         | Lietuvos socialdemokratų partija                                                                       | Social Democratic Party of Lithuania                                                                                                                | 1991-2017            |
| Lithuania                     | LDDP         | Lietuvos demokratinė darbo partija                                                                     | Democratic Labour Party of Lithuania                                                                                                                | 1991-2003            |
| Lithuania                     | SDC-AB       | Social-Democratic Coalition of Algirdas Brazauskas                                                     | Social-Democratic Coalition of Algirdas Brazauskas                                                                                                  | 2000-2003            |
| Luxembourg                    | PS / LSAP    | Parti socialiste / Lëtzebuurger Sozialisteschen Aarbechterpartei                                       | Socialist Party / Luxembourg Socialist Workers' Party                                                                                               | 1918-2017            |
| Macedonia                     | SDSM         | Socijaldemokratski sojuz na Makedonija                                                                 | Social Democratic Union of Macedonia                                                                                                                | 1990-2017            |
| Netherlands                   | SDAP         | Sociaal Democratische Arbeiders Partij                                                                 | Social Democratic Workers' Party                                                                                                                    | 1918-1945            |
| Netherlands                   | PvdA         | Partij van de Arbeid                                                                                   | Labour Party                                                                                                                                        | 1946-2017            |
| Norway                        | DNA          | Det norske Arbeiderpartei                                                                              | Labour Party                                                                                                                                        | 1918-2017            |
| Poland                        | PPS          | Polska Partia Socjalistyczna                                                                           | Polish Socialist Party                                                                                                                              | 1919-1928            |
| Poland                        | SLD          | Sojuz Lewicy Demokratycznej                                                                            | Democratic Left Alliance                                                                                                                            | 1990-2017            |
| Poland                        | UP           | Unia Pracy                                                                                             | Labour Union                                                                                                                                        | 1993-2006            |
| Poland                        | LID          | Lewica i Demokraci                                                                                     | Left and Democrats                                                                                                                                  | 2007-2010            |
| Poland                        | ZL           | Zjednoczona Lewica                                                                                     | United Left                                                                                                                                         | 2015-2017            |
| Portugal                      | PS           | Partido Socialista                                                                                     | Socialist Party                                                                                                                                     | 1975-2017            |
| Romania                       | FPSR         | Federația Partidelor Socialiste din România                                                            | Federation of Socialist Parties from Romania                                                                                                        | 1926-1927            |
| Romania                       | PSD          | Partidul Social Democrat                                                                               | Social Democratic Party                                                                                                                             | 1928-1948            |
| Romania                       | FDSN         | Frontul Democrat al Salvării Nationale                                                                 | Democratic National Salvation Front                                                                                                                 | 1992-2005            |
| Romania                       | PSDR         | Partidul Social Democrat Român                                                                         | Romanian Social Democratic Party                                                                                                                    | 1996-2011            |
| Romania                       | USL          | Uniunea Social Liberală                                                                                | Social Liberal Union                                                                                                                                | 2012-2017            |
| Slovakia                      | SDL          | Strana demokratickej ľavice                                                                            | Party of the Democratic Left                                                                                                                        | 1993-2005            |
| Slovakia                      | SDSS         | Sociálnodemokratická strana Slovenska                                                                  | Social Democratic Party of Slovakia                                                                                                                 | 1993-2005            |
| Slovakia                      | Smer         | Smer-sociálna demokracia                                                                               | Direction Social Democracy                                                                                                                          | 2002-2017            |
| Slovakia                      | SDA          | Sociálnodemokratická alternatíva                                                                       | Social Democratic Alternative                                                                                                                       | 2002-2005            |
| Slovenia                      | ZL / SD      | Združena lista socialnih demokratov / Socialni demokrati                                               | United List of Social Democrats / Social Democrats                                                                                                  | 1992-2017            |
| Slovenia                      | LZJ-PS       | Lista Zorana Jankoviča – Pozitivna Slovenija                                                           | Zoran Janković's List – Positive Slovenia                                                                                                           | 2011-2013            |
| Slovenia                      | ZL           | Združena levica                                                                                        | United Left                                                                                                                                         | 2014-2017            |
| Spain                         | PSOE         | Partido Socialista Obrero Español                                                                      | Spanish Socialist Workers' Party                                                                                                                    | 1977-2008            |
| Spain                         | PSC          | Partit dels Socialistes de Catalunya                                                                   | Party of the Socialists of Catalunya                                                                                                                | 1977-2008            |
| Sweden                        | SAP          | Sveriges socialdemokratiska arbetareparti                                                              | Social Democratic Workers' Party                                                                                                                    | 1918-2017            |
| Switzerland                   | SPS/PPS      | Sozialdemokratische Partei der Schweiz/Parti socialiste suisse/Partito Socialista Svizzero             | Social Democratic/Socialist Party of Switzerland                                                                                                    | 1918-2017            |
| United Kingdom                | Lab          | Labour Party                                                                                           | Labour Party                                                                                                                                        | 1918-2017            |

Table A3: Correlates of social democratic party vote shares, 1945-2017

|                                      | Analysis of levels   |                      | Analysis of differences |                      |
|--------------------------------------|----------------------|----------------------|-------------------------|----------------------|
|                                      | (1)                  | (2)                  | (3)                     | (4)                  |
| Public Spending (% of GDP)           | 0.157**<br>(0.058)   | 0.193***<br>(0.059)  | 0.168**<br>(0.073)      | 0.163**<br>(0.073)   |
| Social Democrat left-right position  | 0.172**<br>(0.081)   | 0.170*<br>(0.084)    | 0.148**<br>(0.068)      | 0.150**<br>(0.069)   |
| Centre Right left-right position     | -0.003<br>(0.036)    | -0.003<br>(0.035)    | -0.036<br>(0.030)       | -0.036<br>(0.030)    |
| District Magnitude                   | 0.574<br>(1.292)     | 0.787<br>(1.308)     | 0.948<br>(1.596)        | 0.912<br>(1.581)     |
| District mag.*SD left-right position | -0.058*<br>(0.030)   | -0.055*<br>(0.032)   | -0.061**<br>(0.027)     | -0.062**<br>(0.027)  |
| SD party in gov't (single-party)     | 1.335<br>(1.256)     | 1.097<br>(1.230)     | -3.175***<br>(0.957)    | -3.187***<br>(0.962) |
| SD party in gov't (coalition-PM)     | 0.976<br>(1.327)     | 0.634<br>(1.285)     | -2.507**<br>(0.963)     | -2.506**<br>(0.966)  |
| SD party in gov't (coalition-junior) | -2.849***<br>(0.912) | -3.056***<br>(0.925) | -2.461***<br>(0.721)    | -2.451***<br>(0.721) |
| Turnout                              | -0.084<br>(0.106)    | -0.086<br>(0.101)    | 0.300**<br>(0.130)      | 0.299**<br>(0.129)   |
| GDP per capita (Madison)             | 3.577<br>(2.877)     | 5.310<br>(3.238)     | 2.008<br>(2.969)        | 2.447<br>(2.910)     |
| GDP growth (Madison)                 | -0.097<br>(0.138)    | -0.057<br>(0.145)    | -0.166<br>(0.224)       | -0.167<br>(0.225)    |
| EU member                            | -1.136<br>(2.055)    | -0.385<br>(2.055)    | -1.283<br>(1.476)       | -1.052<br>(1.572)    |
| Eurozone member                      | 2.646<br>(2.182)     | 2.848<br>(2.112)     | -0.082<br>(1.335)       | -0.021<br>(1.307)    |
| Presidential system                  | 11.214**<br>(4.179)  | 10.644**<br>(3.886)  | 2.444<br>(4.763)        | 2.463<br>(4.777)     |
| Country fixed effects                | Yes                  | Yes                  | Yes                     | Yes                  |
| Decade fixed effects                 | Yes                  | Yes                  | Yes                     | Yes                  |
| Country-year effects                 | No                   | Yes                  | No                      | Yes                  |
| Observations                         | 381                  | 381                  | 353                     | 353                  |
| R-squared                            | 0.162                | 0.176                | 0.169                   | 0.170                |
| Number of countries                  | 31                   | 31                   | 31                      | 31                   |

Note: Dependent variable: social democratic party vote share. Models 1 and 2 estimate effects on the overall level of support for social democratic parties. Models 3 and 4 estimate changes in support between elections (first differences). Standard errors in parentheses.

Table A4: Correlates of Social Democratic votes in the era of globalization, 1975-2017

|                                      | Analysis of levels |          |           |           | Analysis of differences |           |           |           |
|--------------------------------------|--------------------|----------|-----------|-----------|-------------------------|-----------|-----------|-----------|
|                                      | (1)                | (2)      | (3)       | (4)       | (5)                     | (6)       | (7)       | (8)       |
| Public Spending (% of GDP)           | 0.249*             | 0.222*   |           |           | 0.229**                 | 0.206     |           |           |
|                                      | (0.129)            | (0.122)  |           |           | (0.110)                 | (0.125)   |           |           |
| Welfare spending (% GDP)             |                    |          | 0.509**   | 0.532**   |                         |           | 0.839**   | 0.864**   |
|                                      |                    |          | (0.243)   | (0.239)   |                         |           | (0.318)   | (0.327)   |
| Employment in industry (%)           | 0.981***           | 0.866*** | 0.970**   | 0.862**   | 0.147                   | 0.167     | 0.224     | 0.207     |
|                                      | (0.277)            | (0.274)  | (0.348)   | (0.324)   | (0.327)                 | (0.330)   | (0.334)   | (0.323)   |
| Globalization Index                  | 0.027              | 0.036    | 0.251     | 0.226     | 0.210                   | 0.179     | 0.411     | 0.431     |
|                                      | (0.350)            | (0.345)  | (0.451)   | (0.428)   | (0.473)                 | (0.477)   | (0.365)   | (0.378)   |
| Social Democrat left-right position  | 0.102**            | 0.100**  | 0.046     | 0.049     | 0.029                   | 0.032     | 0.040     | 0.040     |
|                                      | (0.048)            | (0.048)  | (0.034)   | (0.035)   | (0.038)                 | (0.039)   | (0.026)   | (0.026)   |
| Centre Right left-right position     | -0.006             | -0.008   | 0.062     | 0.049     | -0.051                  | -0.050    | -0.024    | -0.024    |
|                                      | (0.051)            | (0.051)  | (0.053)   | (0.055)   | (0.043)                 | (0.042)   | (0.036)   | (0.037)   |
| SD party in gov't (single-party)     | -0.347             | -0.598   | -0.148    | -0.524    | -3.523**                | -3.456**  | -3.908**  | -3.954**  |
|                                      | (1.451)            | (1.431)  | (1.826)   | (1.806)   | (1.393)                 | (1.397)   | (1.428)   | (1.407)   |
| SD party in gov't (coalition-PM)     | -0.936             | -0.791   | -1.002    | -1.001    | -3.651***               | -3.583*** | -4.516*** | -4.579*** |
|                                      | (1.435)            | (1.460)  | (1.304)   | (1.302)   | (1.093)                 | (1.110)   | (1.007)   | (1.027)   |
| SD party in gov't (coalition-junior) | -3.214**           | -3.233** | -4.703*** | -5.031*** | -3.705***               | -3.714*** | -5.843*** | -5.837*** |
|                                      | (1.348)            | (1.348)  | (1.314)   | (1.303)   | (1.028)                 | (1.029)   | (1.152)   | (1.157)   |
| Turnout                              | 0.121              | 0.100    | 0.072     | 0.038     | 0.313*                  | 0.309*    | -0.003    | -0.000    |
|                                      | (0.148)            | (0.139)  | (0.157)   | (0.142)   | (0.171)                 | (0.167)   | (0.208)   | (0.207)   |
| Union density                        | -0.197             | -0.184   | -0.457**  | -0.442**  | -0.113                  | -0.106    | -0.454*   | -0.456*   |
|                                      | (0.133)            | (0.132)  | (0.191)   | (0.182)   | (0.147)                 | (0.144)   | (0.241)   | (0.245)   |
| Higher education                     | -0.057             | -0.017   | -0.052    | 0.014     | -0.040                  | -0.039    | -0.177    | -0.175    |
|                                      | (0.074)            | (0.079)  | (0.088)   | (0.097)   | (0.129)                 | (0.126)   | (0.131)   | (0.131)   |
| Life Expectancy                      | 2.500***           | 2.769*** | 0.850     | 1.573**   | 1.916                   | 1.827     | -1.289    | -1.310    |
|                                      | (0.707)            | (0.714)  | (0.639)   | (0.585)   | (1.241)                 | (1.221)   | (1.575)   | (1.570)   |
| District magnitude (%)               | 2.033*             | 1.922*   | 1.835**   | 1.667***  | 1.071                   | 1.053     | 1.247     | 1.233     |
|                                      | (1.166)            | (1.051)  | (0.667)   | (0.583)   | (1.270)                 | (1.219)   | (0.851)   | (0.836)   |
| Employment in agriculture            | 0.490*             | 0.394    | 0.543     | 0.479     | 0.116                   | 0.135     | -1.072**  | -1.102**  |
|                                      | (0.272)            | (0.259)  | (0.583)   | (0.516)   | (0.306)                 | (0.315)   | (0.461)   | (0.481)   |
| Women in work                        | 0.072              | 0.087    | -0.035    | -0.010    | -0.062                  | -0.078    | -0.218    | -0.214    |
|                                      | (0.161)            | (0.155)  | (0.138)   | (0.131)   | (0.168)                 | (0.172)   | (0.217)   | (0.223)   |
| Urban population                     | -0.070             | -0.030   | -0.220    | -0.125    | -0.324                  | -0.336    | -0.623    | -0.624    |
|                                      | (0.228)            | (0.231)  | (0.256)   | (0.248)   | (0.608)                 | (0.615)   | (0.459)   | (0.449)   |
| Population (log)                     | -5.476             | -6.076   | 16.241    | 11.144    | -36.827                 | -45.650   | -10.967   | -6.510    |
|                                      | (12.266)           | (11.672) | (17.767)  | (15.900)  | (46.721)                | (47.695)  | (47.187)  | (48.821)  |
| Population aged 65 and over          | 0.261              | 0.398    | 0.939     | 0.999     | -1.306                  | -1.330    | -1.197    | -1.210    |
|                                      | (0.955)            | (0.953)  | (0.923)   | (0.908)   | (0.793)                 | (0.836)   | (0.971)   | (0.982)   |
| Population aged 0 to 14              | -0.018             | -0.060   | 0.380     | 0.285     | 1.499                   | 1.575     | 1.605     | 1.529     |
|                                      | (0.537)            | (0.554)  | (0.560)   | (0.629)   | (1.047)                 | (1.070)   | (1.056)   | (1.103)   |
| Country fixed-effects                | Yes                | Yes      | Yes       | Yes       | Yes                     | Yes       | Yes       | Yes       |
| Decade fixed-effects                 | Yes                | Yes      | Yes       | Yes       | Yes                     | Yes       | Yes       | Yes       |
| Country-year effects                 | No                 | Yes      | No        | Yes       | No                      | Yes       | No        | Yes       |
| Observations                         | 244                | 244      | 193       | 193       | 227                     | 227       | 171       | 171       |
| R-squared                            | 0.223              | 0.240    | 0.308     | 0.335     | 0.234                   | 0.239     | 0.343     | 0.344     |
| Number of countries                  | 27                 | 27       | 22        | 22        | 27                      | 27        | 22        | 22        |

Note: Dependent variable: social democratic party vote share. Models 1, 2, 3, and 4 estimate effects on the overall level of support for social democratic parties. Models 5, 6, 7, and 8 estimate changes in support between elections (first differences).

Table A5: Correlates of Social Democratic votes in the era of globalization, 1989-2017

|                                      | Analysis of levels |                    |                     |                     | Analysis of differences |                      |                      |                      |
|--------------------------------------|--------------------|--------------------|---------------------|---------------------|-------------------------|----------------------|----------------------|----------------------|
|                                      | (1)                | (2)                | (3)                 | (4)                 | (5)                     | (6)                  | (7)                  | (8)                  |
| Public Spending (% of GDP)           | 0.269<br>(0.166)   | 0.223<br>(0.153)   |                     |                     | 0.281*<br>(0.139)       | 0.267*<br>(0.142)    |                      |                      |
| Welfare spending (% GDP)             |                    |                    | 0.815**<br>(0.385)  | 0.750**<br>(0.353)  |                         |                      | 0.893**<br>(0.392)   | 0.918**<br>(0.382)   |
| Employment in industry (%)           | 0.628*<br>(0.338)  | 0.462<br>(0.375)   | 1.265**<br>(0.462)  | 1.019**<br>(0.488)  | -0.206<br>(0.345)       | -0.207<br>(0.343)    | 0.573<br>(0.398)     | 0.588<br>(0.408)     |
| Globalization Index                  | 0.373<br>(0.424)   | 0.438<br>(0.423)   | 0.534<br>(0.475)    | 0.711<br>(0.441)    | -0.035<br>(0.556)       | -0.031<br>(0.556)    | 0.300<br>(0.464)     | 0.283<br>(0.460)     |
| Social Democrat left-right position  | 0.135*<br>(0.072)  | 0.139*<br>(0.070)  | 0.054<br>(0.053)    | 0.059<br>(0.050)    | 0.024<br>(0.055)        | 0.028<br>(0.056)     | 0.019<br>(0.047)     | 0.017<br>(0.047)     |
| Centre Right left-right position     | 0.008<br>(0.052)   | 0.009<br>(0.052)   | 0.069<br>(0.056)    | 0.060<br>(0.060)    | -0.054<br>(0.048)       | -0.055<br>(0.048)    | 0.000<br>(0.048)     | 0.001<br>(0.048)     |
| SD party in gov't (single-party)     | -2.967<br>(2.005)  | -3.211<br>(2.078)  | -2.371<br>(2.145)   | -3.010<br>(2.501)   | -4.958***<br>(1.705)    | -5.046***<br>(1.698) | -4.183**<br>(1.996)  | -4.099*<br>(2.016)   |
| SD party in gov't (coalition-PM)     | -0.368<br>(1.444)  | -0.492<br>(1.432)  | 0.307<br>(1.034)    | 0.033<br>(1.088)    | -4.042***<br>(1.177)    | -4.053***<br>(1.175) | -3.780***<br>(1.320) | -3.793***<br>(1.327) |
| SD party in gov't (coalition-junior) | -3.425*<br>(1.923) | -3.497*<br>(1.971) | -4.609**<br>(1.709) | -4.983**<br>(1.873) | -4.516***<br>(1.258)    | -4.545***<br>(1.243) | -5.468***<br>(1.430) | -5.470***<br>(1.453) |
| Turnout                              | 0.116<br>(0.172)   | 0.112<br>(0.172)   | -0.088<br>(0.191)   | -0.092<br>(0.190)   | 0.312<br>(0.210)        | 0.314<br>(0.211)     | -0.014<br>(0.228)    | -0.015<br>(0.228)    |
| Union density                        | -0.156<br>(0.160)  | -0.143<br>(0.155)  | -0.662*<br>(0.348)  | -0.669*<br>(0.336)  | -0.028<br>(0.174)       | -0.025<br>(0.172)    | -0.236<br>(0.452)    | -0.207<br>(0.492)    |
| Higher education                     | 0.011<br>(0.087)   | 0.039<br>(0.094)   | -0.105<br>(0.128)   | -0.065<br>(0.141)   | 0.023<br>(0.139)        | 0.021<br>(0.138)     | -0.113<br>(0.154)    | -0.107<br>(0.153)    |
| District magnitude (%)               | 3.193**<br>(1.387) | 3.037**<br>(1.314) | 2.501***<br>(0.703) | 2.341***<br>(0.687) | 2.119<br>(1.690)        | 2.101<br>(1.653)     | 1.774***<br>(0.623)  | 1.764**<br>(0.626)   |
| Employment in agriculture            | 0.443<br>(0.263)   | 0.347<br>(0.244)   | 0.371<br>(0.849)    | 0.251<br>(0.743)    | 0.106<br>(0.297)        | 0.113<br>(0.299)     | -0.852<br>(0.693)    | -0.918<br>(0.740)    |
| Women in work                        | 0.075<br>(0.213)   | 0.096<br>(0.222)   | -0.269<br>(0.189)   | -0.220<br>(0.198)   | -0.056<br>(0.305)       | -0.091<br>(0.340)    | -0.027<br>(0.302)    | 0.018<br>(0.355)     |
| Urban population                     | -0.407<br>(0.316)  | -0.292<br>(0.352)  | -0.452<br>(0.419)   | -0.251<br>(0.414)   | -1.071<br>(1.303)       | -0.980<br>(1.388)    | -1.075<br>(1.248)    | -1.178<br>(1.402)    |
| Population (log)                     | 0.091<br>(16.104)  | 1.331<br>(16.198)  | 36.301*<br>(19.970) | 38.016*<br>(19.812) | -32.993<br>(49.717)     | -28.514<br>(48.114)  | -10.697<br>(52.510)  | -14.727<br>(52.238)  |
| Population aged 65 and over          | 0.112<br>(0.970)   | 0.365<br>(1.058)   | 1.045<br>(0.938)    | 1.434<br>(1.038)    | -1.987*<br>(1.115)      | -1.988*<br>(1.118)   | -1.774<br>(1.456)    | -1.809<br>(1.495)    |
| Population aged 0 to 14              | 0.796<br>(0.853)   | 0.886<br>(0.861)   | 1.194<br>(0.825)    | 1.376<br>(0.859)    | 0.450<br>(1.126)        | 0.587<br>(1.185)     | 1.399<br>(1.267)     | 1.288<br>(1.301)     |
| Country fixed effects                | Yes                | Yes                | Yes                 | Yes                 | Yes                     | Yes                  | Yes                  | Yes                  |
| Decade fixed-effects                 | Yes                | Yes                | Yes                 | Yes                 | Yes                     | Yes                  | Yes                  | Yes                  |
| Country-year effects                 | No                 | Yes                | No                  | Yes                 | No                      | Yes                  | No                   | Yes                  |
| Observations                         | 180                | 180                | 141                 | 141                 | 170                     | 170                  | 136                  | 136                  |
| R-squared                            | 0.204              | 0.209              | 0.323               | 0.341               | 0.270                   | 0.271                | 0.333                | 0.334                |
| Number of countries                  | 27                 | 27                 | 22                  | 22                  | 27                      | 27                   | 22                   | 22                   |

Note: Dependent variable: social democratic party vote share. Models 1, 2, 3, and 4 estimate effects on the overall level of support for social democratic parties, Models 5, 6, 7, and 8 estimate changes in support between elections (first differences) Standard errors in parentheses.

Table A6: Correlates of Social Democratic votes in the era of globalization, 2000-2017

|                                      | Analysis of levels   |                      |                      |                      | Analysis of differences |                      |                      |                      |
|--------------------------------------|----------------------|----------------------|----------------------|----------------------|-------------------------|----------------------|----------------------|----------------------|
|                                      | (1)                  | (2)                  | (3)                  | (4)                  | (5)                     | (6)                  | (7)                  | (8)                  |
| Public Spending (% of GDP)           | 0.818**<br>(0.304)   | 0.792**<br>(0.293)   |                      |                      | 0.646**<br>(0.312)      | 0.644**<br>(0.313)   |                      |                      |
| Welfare spending (% GDP)             |                      |                      | 1.900***<br>(0.574)  | 1.873***<br>(0.493)  |                         |                      | 1.497**<br>(0.690)   | 1.615**<br>(0.668)   |
| Employment in industry (%)           | 0.632<br>(0.761)     | 0.578<br>(0.756)     | 1.949*<br>(1.001)    | 1.785*<br>(1.022)    | 0.354<br>(0.515)        | 0.340<br>(0.566)     | 0.652<br>(0.725)     | 0.565<br>(0.704)     |
| Globalization Index                  | 0.983**<br>(0.366)   | 1.106**<br>(0.424)   | 1.118*<br>(0.623)    | 1.493*<br>(0.753)    | 0.423<br>(0.487)        | 0.434<br>(0.475)     | 0.281<br>(0.716)     | 0.568<br>(0.723)     |
| Social Democrat left-right position  | 0.029<br>(0.061)     | 0.035<br>(0.064)     | 0.114<br>(0.097)     | 0.133<br>(0.100)     | -0.037<br>(0.046)       | -0.038<br>(0.045)    | -0.007<br>(0.080)    | -0.008<br>(0.077)    |
| Centre Right left-right position     | -0.137*<br>(0.067)   | -0.143**<br>(0.064)  | -0.006<br>(0.066)    | -0.038<br>(0.068)    | -0.155***<br>(0.048)    | -0.155***<br>(0.048) | -0.073<br>(0.107)    | -0.076<br>(0.113)    |
| SD party in gov't (single-party)     | 0.359<br>(3.413)     | 0.153<br>(3.410)     | -1.581<br>(4.283)    | -2.269<br>(4.348)    | -1.011<br>(2.040)       | -1.018<br>(2.065)    | -4.025<br>(2.907)    | -4.292<br>(2.825)    |
| SD party in gov't (coalition-PM)     | -1.725<br>(1.557)    | -1.776<br>(1.548)    | 0.334<br>(1.482)     | -0.103<br>(1.509)    | -3.515*<br>(1.829)      | -3.511*<br>(1.838)   | -2.334<br>(2.037)    | -2.597<br>(2.042)    |
| SD party in gov't (coalition-junior) | -4.571**<br>(1.767)  | -4.757**<br>(1.797)  | -3.409<br>(2.103)    | -4.184*<br>(2.328)   | -4.281*<br>(2.151)      | -4.282*<br>(2.162)   | -4.740*<br>(2.690)   | -4.725*<br>(2.671)   |
| Turnout                              | -0.007<br>(0.245)    | 0.011<br>(0.234)     | -0.346<br>(0.265)    | -0.287<br>(0.239)    | 0.094<br>(0.246)        | 0.096<br>(0.243)     | -0.085<br>(0.348)    | -0.034<br>(0.331)    |
| Union density                        | -1.403***<br>(0.324) | -1.406***<br>(0.318) | -1.662***<br>(0.471) | -1.682***<br>(0.439) | -0.603*<br>(0.326)      | -0.607*<br>(0.338)   | -0.305<br>(0.658)    | -0.286<br>(0.664)    |
| Higher education                     | -0.132<br>(0.154)    | -0.129<br>(0.156)    | -0.192<br>(0.175)    | -0.198<br>(0.177)    | -0.153<br>(0.153)       | -0.153<br>(0.156)    | -0.154<br>(0.188)    | -0.117<br>(0.187)    |
| District magnitude (%)               | 6.667***<br>(0.696)  | 6.795***<br>(0.658)  | 5.831***<br>(0.858)  | 6.178***<br>(1.010)  | 8.456***<br>(0.856)     | 8.463***<br>(0.869)  | 7.998***<br>(2.681)  | 8.005***<br>(2.794)  |
| Employment in agriculture            | 0.153<br>(0.519)     | 0.075<br>(0.555)     | -0.282<br>(1.308)    | -0.529<br>(1.339)    | 0.518<br>(0.572)        | 0.516<br>(0.575)     | -1.062<br>(1.381)    | -1.083<br>(1.378)    |
| Women in work                        | 0.262<br>(0.450)     | -0.202<br>(0.494)    | -0.571<br>(0.473)    | -0.432<br>(0.484)    | -0.168<br>(0.607)       | -0.166<br>(0.611)    | -0.025<br>(0.834)    | 0.154<br>(0.883)     |
| Urban population                     | 0.452<br>(0.861)     | 0.660<br>(0.888)     | -0.069<br>(1.135)    | 0.333<br>(1.140)     | -2.729<br>(2.544)       | -2.727<br>(2.555)    | -5.336***<br>(1.876) | -5.408***<br>(1.799) |
| Population (log)                     | -15.089<br>(20.793)  | -13.923<br>(20.159)  | 69.958<br>(41.905)   | 76.205*<br>(43.486)  | 12.364<br>(65.421)      | 12.418<br>(65.911)   | 33.798<br>(75.560)   | 33.826<br>(81.849)   |
| Population aged 65 and over          | -1.185<br>(1.364)    | -0.683<br>(1.956)    | 0.048<br>(1.417)     | 1.235<br>(1.895)     | -0.970<br>(1.871)       | -0.981<br>(1.854)    | -0.229<br>(2.403)    | -0.498<br>(2.282)    |
| Population aged 0 to 14              | 6.257***<br>(1.321)  | 6.341***<br>(1.364)  | 6.919***<br>(1.683)  | 6.809***<br>(1.582)  | 2.697<br>(2.041)        | 2.669<br>(2.030)     | 3.208<br>(2.306)     | 2.828<br>(2.093)     |
| Country fixed effects                | Yes                  | Yes                  | Yes                  | Yes                  | Yes                     | Yes                  | Yes                  | Yes                  |
| Decade fixed-effects                 | Yes                  | Yes                  | Yes                  | Yes                  | Yes                     | Yes                  | Yes                  | Yes                  |
| Country-year effects                 | No                   | Yes                  | No                   | Yes                  | No                      | Yes                  | No                   | Yes                  |
| Observations                         | 107                  | 107                  | 84                   | 84                   | 107                     | 107                  | 84                   | 84                   |
| R-squared                            | 0.502                | 0.505                | 0.534                | 0.548                | 0.452                   | 0.452                | 0.403                | 0.415                |
| Number of countries                  | 27                   | 27                   | 22                   | 22                   | 27                      | 27                   | 22                   | 22                   |

Note: Dependent variable: social democratic party vote share. Models 1, 2, 3, and 4 estimate effects on the overall level of support for social democratic parties. Models 5, 6, 7, and 8 estimate changes in support between elections (first differences) Standard errors in parentheses.



Table A7: SD Economic and Social Left Right position over the period 1945 to 2017

|                                                  | <i>Aggregate Sample</i> | <i>Non East Europe</i> | <i>East Europe</i>  |
|--------------------------------------------------|-------------------------|------------------------|---------------------|
|                                                  | (1)                     | (2)                    | (3)                 |
| SD <i>economic</i> left-right position           | 0.170**<br>(0.0712)     | 0.0747<br>(0.0471)     | 0.554**<br>(0.220)  |
| SD <i>social</i> left-right position             | 0.156**<br>(0.0702)     | 0.0829<br>(0.0562)     | 0.549***<br>(0.161) |
| Centre Right <i>economic</i> left-right position | 0.0233<br>(0.0448)      | 0.0494<br>(0.0451)     | -0.122<br>(0.0993)  |
| Centre Right <i>social</i> left-right position   | -0.0312<br>(0.0482)     | -0.0726*<br>(0.0376)   | 0.0960<br>(0.118)   |
| Control Variables                                | Yes                     | Yes                    | Yes                 |
| Country fixed effects                            | Yes                     | Yes                    | Yes                 |
| Decade fixed effects                             | Yes                     | Yes                    | Yes                 |
| Country-year effects                             | Yes                     | Yes                    | Yes                 |
| Observations                                     | 386                     | 298                    | 88                  |
| R-squared                                        | 0.171                   | 0.249                  | 0.457               |
| Number of countries                              | 31                      | 18                     | 13                  |

Note: Dependent variable: social democratic party vote share. All models estimate effects on the overall level of support for social democratic parties. Standard errors in parentheses.

Table A8: Robustness tests: social democratic party vote share vs. social democratic, including the Italian Communist party, vote share vs. total left vote share and vs. centre right vote share as dependent variables, 1945-2017

|                          | (1)                  | (2)                     | (3)                   | (4)                 |
|--------------------------|----------------------|-------------------------|-----------------------|---------------------|
|                          | Soc. Dem. vote share | SD with Communist Party | Total Left vote share | C. Right vote share |
| Public Spending (% GDP)  | 0.192***<br>(0.0594) | 0.207***<br>(0.0602)    | 0.0843<br>(0.0725)    | 0.143<br>(0.0888)   |
| District Magnitude (log) | 2.612<br>(1.652)     | 3.444***<br>(1.250)     | 2.714**<br>(1.072)    | 0.787<br>(1.110)    |
| Turnout                  | -0.172<br>(0.107)    | -0.162<br>(0.104)       | -0.131<br>(0.122)     | 0.0868<br>(0.144)   |
| GDP per capita (Madison) | 6.958**<br>(2.928)   | 7.822**<br>(2.883)      | 6.560<br>(4.066)      | 0.752<br>(5.049)    |
| GDP growth (Madison)     | -0.0666<br>(0.159)   | -0.0453<br>(0.157)      | -0.152<br>(0.177)     | 0.187<br>(0.160)    |
| Controls                 | Yes                  | Yes                     | Yes                   | Yes                 |
| Country Fes              | Yes                  | Yes                     | Yes                   | Yes                 |
| Decade Fes               | Yes                  | Yes                     | Yes                   | Yes                 |
| Country-year time trends | Yes                  | Yes                     | Yes                   | Yes                 |
| Observations             | 409                  | 409                     | 409                   | 409                 |
| R-squared                | 0.159                | 0.188                   | 0.088                 | 0.167               |
| Number of countries      | 31                   | 31                      | 31                    | 31                  |

Note: Column 1 exhibits estimates for Soc. Dem as in Table 3; Column 2, includes the Italian Communist Party; Column 3 focuses on total left and Column 4 total right. All models are conditional on country Fes, Decade Fes and, progressively, Country Year Time Trends. Standard errors in parentheses. Controls include regime types, european membership and parties left and right social and economic position.

Table A9: Robustness tests: social democratic party vote share vs. total left vote share and vs. centre right vote share as dependent variables, 1975-2017

|                          | (1)                  | (2)                     | (3)                   | (4)                 |
|--------------------------|----------------------|-------------------------|-----------------------|---------------------|
|                          | Soc. Dem. vote share | SD with Communist Party | Total Left vote share | C. Right vote share |
| Public Spending (% GDP)  | 0.753***<br>(0.260)  | 0.737***<br>(0.250)     | 0.140<br>(0.352)      | 0.202<br>(0.271)    |
| District Magnitude (log) | 0.655**<br>(0.313)   | 0.546*<br>(0.293)       | -0.114<br>(0.301)     | 0.385<br>(0.336)    |
| Turnout                  | 0.164<br>(0.400)     | 0.373<br>(0.346)        | 0.198<br>(0.410)      | 0.104<br>(0.476)    |
| GDP per capita (Madison) | 0.156<br>(0.118)     | 0.126<br>(0.114)        | 0.115<br>(0.152)      | -0.0295<br>(0.155)  |
| GDP growth (Madison)     | -0.380**<br>(0.177)  | -0.391**<br>(0.180)     | -0.212<br>(0.172)     | -0.285<br>(0.288)   |
| Controls                 | Yes                  | Yes                     | Yes                   | Yes                 |
| Country Fes              | Yes                  | Yes                     | Yes                   | Yes                 |
| Decade Fes               | Yes                  | Yes                     | Yes                   | Yes                 |
| Country-year time trends | Yes                  | Yes                     | Yes                   | Yes                 |
| Observations             | 209                  | 209                     | 209                   | 209                 |
| R-squared                | 0.317                | 0.337                   | 0.160                 | 0.294               |
| Number of countries      | 22                   | 22                      | 22                    | 22                  |

Note: Column 1 exhibits estimates for Soc. Dem as in Table 3; Column 2, includes the Italian Communist Party; Column 3 focuses on total left and Column 4 total right. All models are conditional on country Fes, Decade Fes and, progressively, Country Year Time Trends. Standard errors in parentheses. Controls include regime types, european membership and parties left and right social and economic position.

Table A10: Heterogeneity Analysis, 1945-2017

|                                       | Western Europe |          | Eastern Europe |         |
|---------------------------------------|----------------|----------|----------------|---------|
|                                       | (1)            | (2)      | (3)            | (4)     |
| Public spending (% ofGDP)             | 0.0954*        | 0.131**  | 1.167***       | 1.343** |
|                                       | (0.0505)       | (0.0548) | (0.370)        | (0.457) |
| District magnitude (log)              | -0.706         | -0.534   | 3.809          | 3.134   |
|                                       | (0.737)        | (0.744)  | (4.305)        | (4.198) |
| District mag.*SD left-right position  | -0.00435       | -0.00235 | 0.0338         | 0.029   |
|                                       | (0.0075)       | (0.0075) | (0.035)        | (0.037) |
| Social democratic party in government | 0.572          | 0.323    | -2.536         | -2.277  |
|                                       | (0.900)        | (0.805)  | (1.609)        | (1.682) |
| Turnout                               | -0.0093        | -0.0084  | -0.189         | -0.113  |
|                                       | (0.117)        | (0.105)  | (0.169)        | (0.202) |
| GDP per capita (Madison)              | 2.878          | 4.506    | 8.073          | 3.267   |
|                                       | (2.984)        | (3.729)  | (4.855)        | (6.089) |
| GDP growth (Madison)                  | -0.130         | -0.0744  | -0.321         | -0.379  |
|                                       | (0.121)        | (0.142)  | (0.358)        | (0.349) |
| Eu member                             | -1.079         | -0.405   | -5.546         | -7.264  |
|                                       | (2.487)        | (2.500)  | (4.046)        | (4.923) |
| Presidential system                   | 11.51***       | 10.96*** | 4.657          | 5.523   |
|                                       | (1.656)        | (1.631)  | (7.391)        | (8.090) |
| Country fixed effects                 | Yes            | Yes      | Yes            | Yes     |
| Decade fixed effects                  | Yes            | Yes      | Yes            | Yes     |
| Country-year effects                  | No             | Yes      | No             | Yes     |
| Observations                          | 294            | 294      | 87             | 87      |
| R-squared                             | 0.135          | 0.150    | 0.242          | 0.248   |
| Number of countries                   | 18             | 18       | 13             | 13      |

Note: Dependent variable: social democratic party vote share. Columns 1 and 2 estimate effects on the overall level of support for social democratic parties in Western Europe. Western Europe includes Southern European and Scandinavian countries. Columns 3 and 4 estimate the overall level of support for SD parties in Eastern Europe. Standard errors in parentheses.

Table A11: Heterogeneity Analysis within Western Europe, 1945-2017

|                                       | Western Europe      | Southern Europe     |                    | Scandinavia            |
|---------------------------------------|---------------------|---------------------|--------------------|------------------------|
|                                       | (1)                 | (2)                 | (3)                | (4)                    |
| Public spending (% of GDP)            | 0.119<br>(0.112)    | -0.612**<br>(0.149) | -0.328<br>(0.293)  | 0.0284<br>(0.114)      |
| District magnitude (log)              | -1.776<br>(1.538)   | -0.239<br>(0.563)   | 1.826<br>(1.041)   | 2.587<br>(3.912)       |
| District mag.*SD left-right position  | 0.0125<br>(0.0138)  | 0.0614<br>(0.0310)  | 0.0450<br>(0.0336) | -0.000531<br>(0.00912) |
| Social democratic party in government | -1.233<br>(0.841)   | 0.0705<br>(1.523)   | -0.0491<br>(1.690) | 0.423<br>(0.424)       |
| Turnout                               | 0.0753<br>(0.154)   | 0.549*<br>(0.252)   | 0.585<br>(0.299)   | -0.241<br>(0.149)      |
| GDP per capita (Madison)              | 12.03**<br>(4.172)  | -9.341<br>(12.41)   | -5.258<br>(16.83)  | 0.246<br>(3.709)       |
| GDP growth (Madison)                  | 0.0536<br>(0.141)   | -1.125**<br>(0.257) | -0.842*<br>(0.356) | 0.221<br>(0.147)       |
| Eu member                             | -4.317**<br>(1.699) | 11.71*<br>(4.672)   | 15.38**<br>(4.439) | -1.589<br>(3.641)      |
| Observations                          | 155                 | 59                  | 59                 | 80                     |
| R-squared                             | 0.480               | 0.576               | 0.548              | 0.639                  |
| Number of countries                   | 9                   | 5                   | 5                  | 4                      |
| Country fixed effects                 | Yes                 | Yes                 | Yes                | Yes                    |
| Decade fixed effects                  | Yes                 | Yes                 | Yes                | Yes                    |
| Country-year time trends              | Yes                 | Yes                 | Yes                | Yes                    |

Note: Columns 1 exhibits estimates on the overall level of support for social democratic parties in Western Europe. Column 2 and 3 focus on Southern Europe. Column 2 studies the effect on SD parties, Column 3 includes the Italian Communist Party. Column 4 focuses on Scandinavian countries. All estimates are conditional on country fixed effects, decade fixed effects and, progressively, country year specific time trends. Standard errors in parentheses.

Table A12: Randomization, 1950-2017

|                                       | Post-1950                 |                                |
|---------------------------------------|---------------------------|--------------------------------|
|                                       | <i>Analysis of levels</i> | <i>Analysis of differences</i> |
|                                       | (1)                       | (2)                            |
| Public spending (% of GDP)            | 0.197**<br>(0.079)        | 0.148**<br>(0.066)             |
| Social Democrat left-right position   | 0.158<br>(0.097)          | 0.134**<br>(0.059)             |
| Centre Right left-right position      | -0.012<br>(0.040)         | -0.034<br>(0.028)              |
| District magnitude (log)              | 0.139<br>(1.537)          | 0.970<br>(1.455)               |
| District mag.*SD left-right position  | -0.046<br>(0.035)         | -0.056**<br>(0.025)            |
| Social democratic party in government | 1.250<br>(1.175)          | -6.392***<br>(1.308)           |
| Turnout (%)                           | -0.123<br>(0.107)         | 0.287**<br>(0.122)             |
| Controls                              | Yes                       | Yes                            |
| Country fixed-effects                 | Yes                       | Yes                            |
| Decade fixed-effects                  | Yes                       | Yes                            |
| Country-year time trends              | Yes                       | Yes                            |
| Observations                          | 381                       | 353                            |
| R-squared                             | 0.176                     | 0.170                          |
| Number of countries                   | 31                        | 31                             |

Note: Dependent variable: social democratic party vote share. Column 1 estimates effects on the overall level of support for social democratic parties, whereas Column 2 estimates changes in support between elections (first differences). The estimates replicate Table 3, but with a different time period, from 1950 onwards. Standard errors in parentheses. Results not shown for the constant and the control variables: GDP per capita (log), GDP growth, EU member, Eurozone member, presidential system.

Table A13: Randomization, 1970-2017 and 1980-2017

|                                     | Post-1970                 |          |                                |          | Post-1980                 |          |                                |          |
|-------------------------------------|---------------------------|----------|--------------------------------|----------|---------------------------|----------|--------------------------------|----------|
|                                     | <i>Analysis of levels</i> |          | <i>Analysis of differences</i> |          | <i>Analysis of levels</i> |          | <i>Analysis of differences</i> |          |
|                                     | (1)                       | (2)      | (3)                            | (4)      | (5)                       | (6)      | (7)                            | (8)      |
| Public spending (% of GDP)          | 0.205*                    |          | 0.225*                         |          | 0.110                     |          | 0.200                          |          |
|                                     | (0.105)                   |          | (0.112)                        |          | (0.121)                   |          | (0.146)                        |          |
| Welfare spending (% of GDP)         |                           | 0.613**  |                                | 0.794**  |                           | 0.675**  |                                | 0.794**  |
|                                     |                           | (0.238)  |                                | (0.362)  |                           | (0.241)  |                                | (0.362)  |
| Employment in industry (%)          | 0.841***                  | 0.810**  | 0.201                          | 0.267    | 0.766**                   | 0.939**  | 0.152                          | 0.267    |
|                                     | (0.241)                   | (0.307)  | (0.338)                        | (0.388)  | (0.345)                   | (0.355)  | (0.390)                        | (0.388)  |
| Globalization index                 | 0.030                     | 0.211    | 0.261                          | 0.455    | 0.093                     | 0.263    | 0.297                          | 0.455    |
|                                     | (0.327)                   | (0.437)  | (0.488)                        | (0.426)  | (0.362)                   | (0.447)  | (0.496)                        | (0.426)  |
| Social Democrat left-right position | 0.078                     | 0.048    | 0.008                          | 0.018    | 0.105**                   | 0.049    | 0.019                          | 0.018    |
|                                     | (0.048)                   | (0.035)  | (0.036)                        | (0.030)  | (0.050)                   | (0.040)  | (0.038)                        | (0.030)  |
| Centre Right left-right position    | 0.002                     | 0.053    | -0.052                         | -0.023   | 0.002                     | 0.050    | -0.054                         | -0.023   |
|                                     | (0.048)                   | (0.055)  | (0.042)                        | (0.043)  | (0.055)                   | (0.056)  | (0.043)                        | (0.043)  |
| Social dem. party in government     | -1.675                    | -2.748** | -3.475**                       | -3.293** | -3.071**                  | -3.163** | -3.960**                       | -3.293** |
|                                     | (1.040)                   | (1.280)  | (1.307)                        | (1.523)  | (1.109)                   | (1.350)  | (1.557)                        | (1.523)  |
| Turnout (%)                         | 0.110                     | 0.039    | 0.350**                        | 0.202    | 0.041                     | -0.008   | 0.363**                        | 0.202    |
|                                     | (0.136)                   | (0.144)  | (0.160)                        | (0.210)  | (0.146)                   | (0.168)  | (0.172)                        | (0.210)  |
| Union Density                       | -0.192                    | -0.463** | -0.120                         | -0.436   | -0.183                    | -0.517** | -0.125                         | -0.436   |
|                                     | (0.116)                   | (0.191)  | (0.144)                        | (0.292)  | (0.140)                   | (0.214)  | (0.161)                        | (0.292)  |
| Controls                            | Yes                       | Yes      | Yes                            | Yes      | Yes                       | Yes      | Yes                            | Yes      |
| Country fixed-effects               | Yes                       | Yes      | Yes                            | Yes      | Yes                       | Yes      | Yes                            | Yes      |
| Decade fixed-effects                | Yes                       | Yes      | Yes                            | Yes      | Yes                       | Yes      | Yes                            | Yes      |
| Country-year time trends            | Yes                       | Yes      | Yes                            | Yes      | Yes                       | Yes      | Yes                            | Yes      |
| Observations                        | 244                       | 193      | 244                            | 193      | 227                       | 171      | 227                            | 171      |
| R-squared                           | 0.223                     | 0.308    | 0.240                          | 0.335    | 0.234                     | 0.343    | 0.239                          | 0.344    |
| Number of countries                 | 27                        | 22       | 27                             | 22       | 27                        | 22       | 27                             | 22       |

Note: Dependent variable: social democratic party vote share. Columns 1, 2, 5, and 6 estimate effects on the overall level of support for social democratic parties, whereas Columns 3, 4, 7, and 8 estimate changes in support between elections (first differences). Estimates replicate Table 4, but with a different time period. Precisely, Columns 1 to 4 perform the analysis from 1970 onwards, whereas Columns 5 to 8 do so from 1980 onwards. Standard errors in parentheses. Results not shown for the constant, and the control variables: employment in agriculture, women in work, urban population, life expectancy, population (log), population aged 65 and over, population aged 0 to 14, percent in higher education.

Table A14: Randomization, 1985-2017, 1995-2017, and 2005-2017

|                                              | Post-1985            |                     | Post-1995<br><i>Analysis of levels</i> |                     | Post-2005            |                      |
|----------------------------------------------|----------------------|---------------------|----------------------------------------|---------------------|----------------------|----------------------|
|                                              | (1)                  | (2)                 | (3)                                    | (4)                 | (5)                  | (6)                  |
| Public spending (% of GDP)                   | 0.223<br>(0.151)     |                     | 0.505**<br>(0.209)                     |                     | 0.746*<br>(0.396)    |                      |
| Public spending on social welfare (% of GDP) |                      | 0.905***<br>(0.239) |                                        | 1.032**<br>(0.381)  |                      | 0.843<br>(0.786)     |
| Employment in industry (%)                   | 0.627*<br>(0.354)    | 1.007**<br>(0.447)  | 0.547<br>(0.548)                       | 1.033<br>(0.630)    | 0.428<br>(1.549)     | 1.507<br>(1.862)     |
| Globalization index                          | 0.248<br>(0.410)     | 0.475<br>(0.421)    | 0.930***<br>(0.212)                    | 0.984**<br>(0.473)  | -0.608<br>(0.994)    | -2.814<br>(2.442)    |
| Social Democrat left-right position          | 0.112<br>(0.068)     | 0.033<br>(0.050)    | 0.116*<br>(0.062)                      | 0.128*<br>(0.062)   | 0.052<br>(0.066)     | 0.007<br>(0.104)     |
| Centre Right left-right position             | 0.007<br>(0.057)     | 0.075<br>(0.054)    | -0.123**<br>(0.051)                    | 0.007<br>(0.068)    | -0.186***<br>(0.048) | 0.021<br>(0.132)     |
| Social democratic party in government        | -2.833*<br>(1.424)   | -3.292*<br>(1.615)  | -2.289*<br>(1.322)                     | -2.743<br>(1.752)   | -2.714<br>(2.694)    | 0.260<br>(2.781)     |
| Turnout (%)                                  | 0.083<br>(0.166)     | -0.073<br>(0.167)   | -0.004<br>(0.179)                      | -0.147<br>(0.219)   | 0.171<br>(0.206)     | 0.650<br>(0.532)     |
| Observations                                 | 201                  | 162                 | 141                                    | 111                 | 73                   | 58                   |
| R-squared                                    | 0.171                | 0.340               | 0.496                                  | 0.471               | 0.474                | 0.504                |
| Number of countries                          | 27                   | 22                  | 27                                     | 22                  | 27                   | 22                   |
|                                              |                      |                     | <i>Analysis of differences</i>         |                     |                      |                      |
|                                              | (7)                  | (8)                 | (9)                                    | (10)                | (11)                 | (12)                 |
| Public spending (% of GDP)                   | 0.297*<br>(0.156)    |                     | 0.661**<br>(0.250)                     |                     | 0.484<br>(0.439)     |                      |
| Public spending on social welfare (% of GDP) |                      | 0.873**<br>(0.399)  |                                        | 1.756***<br>(0.528) |                      | -0.269<br>(1.036)    |
| Employment in industry (%)                   | -0.104<br>(0.363)    | 0.666<br>(0.467)    | 0.289<br>(0.452)                       | 1.084*<br>(0.536)   | -0.992<br>(0.870)    | -0.909<br>(1.354)    |
| Globalization index                          | 0.073<br>(0.530)     | 0.342<br>(0.488)    | -0.270<br>(0.748)                      | 0.460<br>(0.597)    | -0.095<br>(1.198)    | -0.027<br>(1.373)    |
| Social Democrat left-right position          | 0.006<br>(0.047)     | 0.002<br>(0.036)    | 0.006<br>(0.066)                       | -0.005<br>(0.055)   | -0.086<br>(0.079)    | 0.051<br>(0.144)     |
| Centre Right left-right position             | -0.058<br>(0.046)    | -0.010<br>(0.041)   | -0.110*<br>(0.054)                     | -0.016<br>(0.079)   | -0.155*<br>(0.086)   | -0.065<br>(0.170)    |
| Social democratic party in government        | -4.432***<br>(1.590) | -3.420*<br>(1.807)  | -3.559**<br>(1.404)                    | -4.119*<br>(2.214)  | -9.589***<br>(2.559) | -8.585***<br>(2.724) |
| Turnout (%)                                  | 0.349*<br>(0.189)    | 0.164<br>(0.221)    | 0.295<br>(0.221)                       | 0.065<br>(0.278)    | 0.344<br>(0.230)     | 0.067<br>(0.375)     |
| Observations                                 | 191                  | 157                 | 139                                    | 107                 | 73                   | 58                   |
| R-squared                                    | 0.207                | 0.206               | 0.258                                  | 0.337               | 0.573                | 0.560                |
| Number of countries                          | 27                   | 22                  | 27                                     | 22                  | 27                   | 22                   |
| Controls                                     | Yes                  | Yes                 | Yes                                    | Yes                 | Yes                  | Yes                  |
| Country fixed-effects                        | Yes                  | Yes                 | Yes                                    | Yes                 | Yes                  | Yes                  |
| Decade fixed-effects                         | Yes                  | Yes                 | Yes                                    | Yes                 | Yes                  | Yes                  |
| Country-year time trends                     | Yes                  | Yes                 | Yes                                    | Yes                 | Yes                  | Yes                  |

Note: Dependent variable: social democratic party vote share. Models 1 to 6 estimate effects on the overall level of support for social democratic parties, whereas models 7 to 12 estimate changes in support between elections (first differences). The estimates replicate Table 5, but with a different time period. Precisely, Columns 1, 2, 7, and 8 perform the analysis for a period just before the end of the Cold-War, whereas Columns 3, 4, 9, and 10 for a period just after the end of it. Columns 5, 6, 11, and 12 perform the analysis for a period just after the Great Recession. Standard errors in parentheses. Results not shown for the constant and the control variables: employment in agriculture, women in work, urban population, population (log), population aged 65 and over, population aged 0 to 14, union density, percent in higher education.



Table A15: Individual-level correlates of voting for a social democratic party

|                              | (1)                      | (2)                      | (3)                      | (4)                      | (5)                      | (6)                      | (7)                      | (8)                      |
|------------------------------|--------------------------|--------------------------|--------------------------|--------------------------|--------------------------|--------------------------|--------------------------|--------------------------|
| ESS Waves                    | 1-2002                   | 2-2004                   | 3-2006                   | 4-2008                   | 5-2010                   | 6-2012                   | 7-2014                   | 8-2016                   |
| Worker in industry           | 0.0311**<br>(0.0107)     | 0.0392**<br>(0.0132)     | 0.0386**<br>(0.0137)     | 0.0303**<br>(0.0129)     | 0.0122<br>(0.0122)       | 0.0204<br>(0.0150)       | 0.0209*<br>(0.0117)      | 0.0189*<br>(0.00885)     |
| Public sector employee       | 0.0784***<br>(0.0158)    | 0.0862***<br>(0.0187)    | 0.0646***<br>(0.0146)    | 0.0805***<br>(0.0130)    | 0.0790***<br>(0.0115)    | 0.0632***<br>(0.0121)    | 0.0664***<br>(0.00976)   | 0.0583***<br>(0.00992)   |
| Socio- cultural professional | 0.0241*<br>(0.0126)      | 0.0208<br>(0.0142)       | 0.0352<br>(0.0200)       | 0.0291*<br>(0.0145)      | 0.0131<br>(0.0135)       | 0.0402*<br>(0.0188)      | 0.0261**<br>(0.0121)     | 0.0245*<br>(0.0115)      |
| Male                         | 0.0108<br>(0.00640)      | 0.00461<br>(0.00664)     | 0.00101<br>(0.00732)     | -0.00188<br>(0.00456)    | 0.00287<br>(0.00671)     | 0.00502<br>(0.00586)     | 0.00177<br>(0.00429)     | -0.00436<br>(0.00538)    |
| Lived in a city              | 0.0205<br>(0.0117)       | 0.0106<br>(0.00644)      | 0.0415***<br>(0.0117)    | 0.0214**<br>(0.00982)    | 0.0350***<br>(0.00893)   | 0.0264**<br>(0.00933)    | 0.0231*<br>(0.0113)      | 0.0359**<br>(0.0124)     |
| Lives in a town              | 0.0186*<br>(0.00934)     | 0.0236***<br>(0.00764)   | 0.0292***<br>(0.00866)   | 0.0273***<br>(0.00581)   | 0.0168<br>(0.00976)      | 0.0144<br>(0.0105)       | 0.0172***<br>(0.00452)   | 0.0120<br>(0.00833)      |
| Age                          | 0.00260***<br>(0.000289) | 0.00255***<br>(0.000374) | 0.00220***<br>(0.000238) | 0.00269***<br>(0.000294) | 0.00247***<br>(0.000212) | 0.00266***<br>(0.000273) | 0.00258***<br>(0.000250) | 0.00252***<br>(0.000287) |
| Observations                 | 28,686                   | 27,843                   | 28,603                   | 29,049                   | 27,428                   | 28,921                   | 26,947                   | 24,668                   |
| R-squared                    | 0.018                    | 0.018                    | 0.016                    | 0.021                    | 0.020                    | 0.022                    | 0.023                    | 0.023                    |
| Number of countries          | 15                       | 15                       | 15                       | 15                       | 15                       | 15                       | 15                       | 14                       |

Note: Dependent variable: vote for a social democratic party. Estimation: Linear probability model with country fixed-effects. Baselines: female, lives in a rural area, other professional and socio-economic status. Data from the 8 waves of the European Social Survey. Countries included: Belgium, Finland, France, Germany, Hungary, Netherlands, Norway, Poland, Portugal, Slovenia, Spain, Sweden, Switzerland, and United Kingdom. Standard errors in parentheses.

## References

- Boix, Carles. 1999. "Setting the Rules of the Game: The Choice of Electoral Systems in Advanced Democracies." *American Political Science Review* 93:609–624.
- Carey, John M. and Simon Hix. 2011. "The Electoral Sweet Spot: Low-Magnitude Proportional Electoral Systems." *American Journal of Political Science* 55:383–397.
- Gygli, Savina et al. 2019. "The KOF Globalisation Index - Revisited." *Review of International Organizations* 14:543–574.
- Jacobs, Francis. 1989. *Western European Political Parties: A Comprehensive Guide*. London: Longman.
- Nohlen, Dieter and Philip Stoeber. 2010. *Elections in Europe: A Data Handbook*. Baden-Baden: Nomos.
- Timmer, Marcel P. et al. 2015. *Routledge Handbook of Industry and Development*. London: Routledge chapter Patterns of Structural Change in Developing Countries, pp. 65–83.
